# Supplementary material for: Ranking factors involved in diabetes remission after bariatric surgery using machine-learning integrating clinical and genomic biomarkers
Source: PubMed Central journal article supplement (PMC5685313; doi:10.1038/npjgenmed.2016.35), 2016-10-26
Supplement: npjgenmed201635-s5.pdf [file npjgenmed201635-s5.pdf]

# Supplementary Figure 4

a

5-fold outer cross validation:

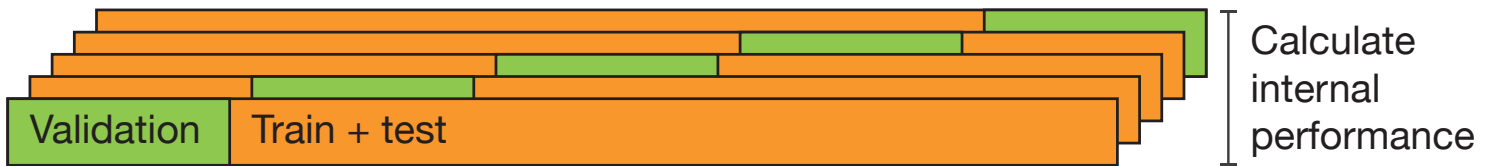

5-fold inner cross validation:

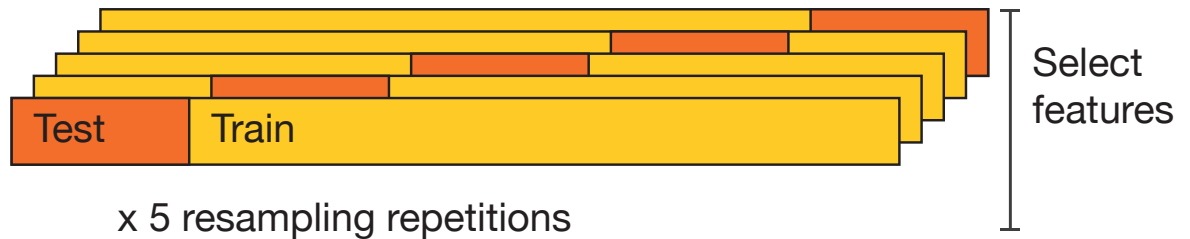

b

Select features:

**for** each of the five outer cross-validation fold **do**

Partition original data into **(train+test)** and **validation** sets

**for** each of the five inner cross-validation fold and five resampling iteration **do**

Partition **(train+test)** data into **train** and **test** sets

Standardise **train data**

Standardise **test data** using standard deviation and mean of **train data**

Forward feature selection by training neural network on **training data**, keep adding features as long as AUC on **test data** increase  $\geq 0.01$ .

**end**

**end**

Determine appropriate set of features: All features selected

- at least once in each outer cross-validation fold, and
- at least  $X$  times over all 125 cross-validation folds/resampling iterations

Calculate internal performance:

**for** each of the five outer cross-validation fold **do**

Partition original data into **(train+test)** and **validation** sets

Standardise **(train+test) data**

Standardise **validation data** using standard deviation and mean of **(train+test) data**

Train neural network model using **(train+test) data** and appropriate set of features

Predict remission/non-remission for **validation** set

**end**

Calculate prediction performance for **validation** sets
