# Supplementary material for: Ranking factors involved in diabetes remission after bariatric surgery using machine-learning integrating clinical and genomic biomarkers
Source: PubMed Central journal article supplement (PMC5685313; doi:10.1038/npjgenmed.2016.35), 2016-10-26

# Supplementary Figure 5

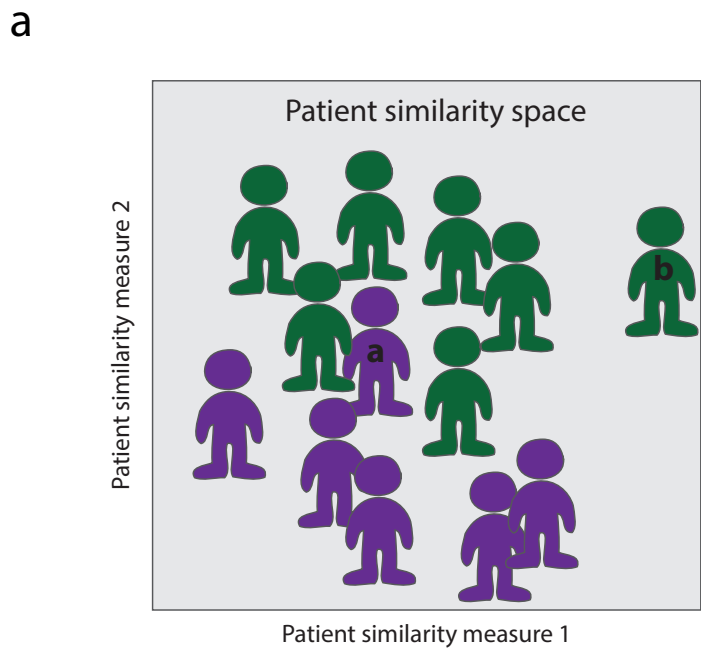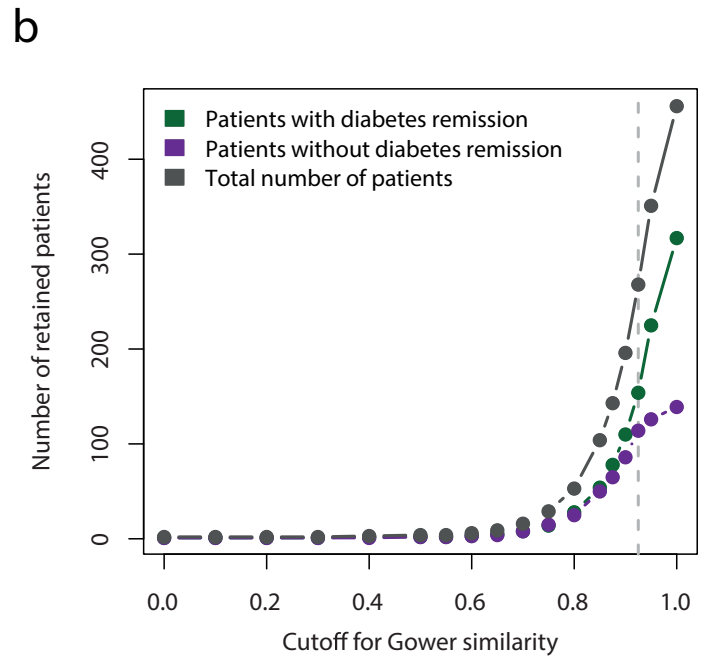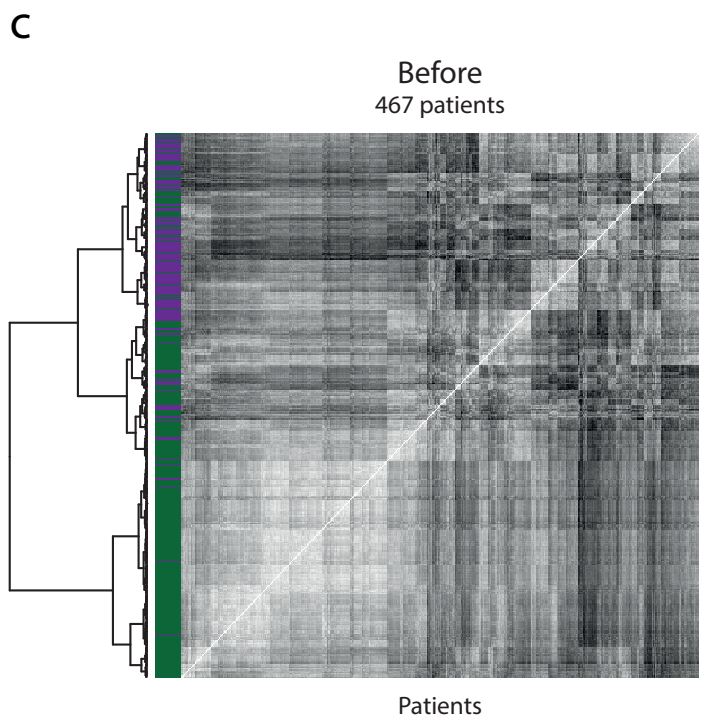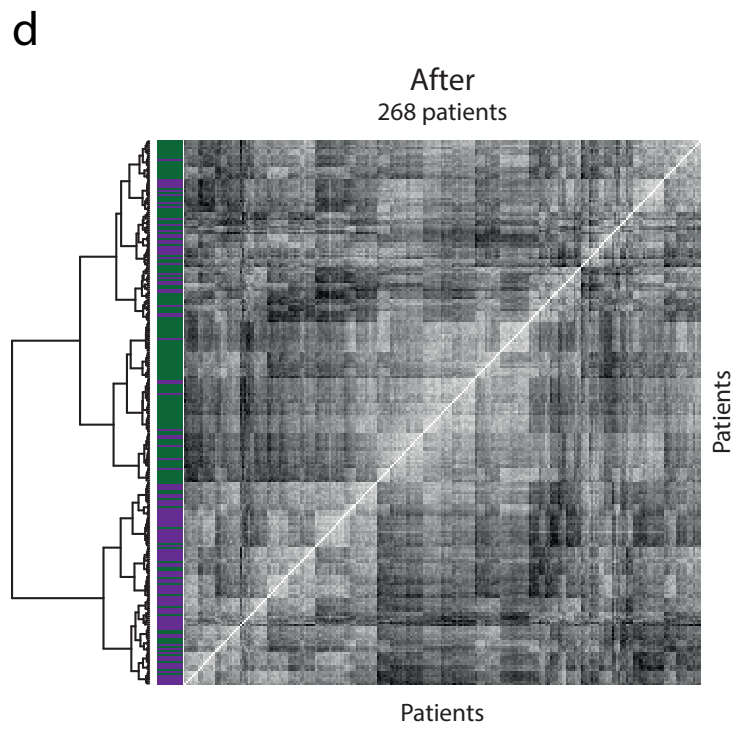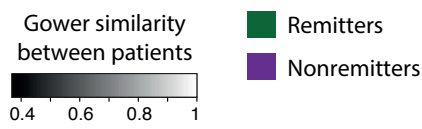

Supplement: npjgenmed201635-s6.pdf [file npjgenmed201635-s6.pdf]
